# Supplementary material
Source: publisher figshare collection journal article supplement (https://acs.figshare.com/ndownloader/files/5781978)

## Supporting Information

# Asymmetric Pauson-Khand Reactions using Camphor-derived Chelating Thiols as Chiral Controllers.

*Iolanda Marchueta, Elvira Montenegro, Dmitri Panov, Marta Poch, Xavier Verdaguer, Albert Moyano, Miquel A. Pericàs,\* and Antoni Riera\**

*Unitat de Recerca en Síntesi Asimètrica, Departament de Química Orgànica, Universitat de Barcelona, Martí i Franqués 1-11, 08028 Barcelona, Spain.*

A.RIERA@QO.UB.ES

### Experimental Section.

**Pauson-Khand reactions of 7b with Norbornadiene.** Procedure B using as reagents: **7b** (0.12 g, 0.33 mmol),  $\text{Co}_2(\text{CO})_8$  (0.12 mg, 0.35 mmol), NMO (0.24 g, 2.06 mmol) and norbornadiene (0.35 mL, 3.3 mmol) was followed. The reaction was performed at 0°C during 48 h, affording 49 mg (31% yield, two steps) of **11b** (25:75 diastereomeric ratio as determined by  $^{13}\text{C}$  NMR).

Procedure C using as reagents: **7b** (0.22 g, 0.6 mmol),  $\text{Co}_2(\text{CO})_8$  (0.22 g, 0.65 mmol), and norbornadiene (0.64 g, 6.3 mmol) was followed. The reaction was performed at 0°C during 40 h, after addition of the olefin at -15°C, affording 168 mg (56% yield, two steps) of **11b** (98:2 diastereomeric ratio as determined by  $^{13}\text{C}$  NMR).

Procedure D using as reagents: **10b** (0.2 g, 0.33 mmol), norbornadiene (0.33 g, 3.3 mmol), and hexane (6 mL) was followed. The reaction was performed at 0°C during 48 h, after addition of the

olefin at  $-15^{\circ}\text{C}$ , affording 100 mg (64% yield) of **11b** (95:5 diastereomeric ratio as determined by  $^{13}\text{C}$  NMR).

**(1R,2R,6S,7S)-4-[(1S,2R,4R)-7,7-dimethyl-1-(2,4,6-trimethylbenzylsulfanyl)methylbicyclo[2.2.1]hept-2-ylsulfanyl]tricyclo[5.2.1.0<sup>2,6</sup>]deca-4,8-dien-3-one (11b).**  $[\alpha]_{\text{D}} = +16.9$  (c 1.0,  $\text{CDCl}_3$ ). IR (film)  $\nu_{\text{max}} = 2954, 1704, 1563, 1457 \text{ cm}^{-1}$ .  $^1\text{H}$  NMR (200 MHz,  $\text{CDCl}_3$ )  $\delta$  7.05 (d, 1H), 6.78 (broad s, 2H), 6.30-6.15 (m, 2H), 3.8, 3.74 (AB,  $J = 11\text{Hz}$ , 2H), 3.38-3.25 (dd, 1H), 2.95, 2.85 (AB,  $J = 12\text{Hz}$ , 2H), 2.95-0.95 (complex signal, 13H), 2.33 (s, 6H), 2.21 (s, 3H), 1.05 (s, 3H), 0.89 (s, 3H).  $^{13}\text{C}$  NMR (75 MHz,  $\text{CDCl}_3$ )  $\delta = 206.0$  (C), 152.6 (CH), 146.5 (2C), 138.2 (CH), 137.0 (CH), 136.8 (C), 136.3 (C), 131.3 (C), 128.8 (2CH), 53.5 (C), 52.5 (CH), 50.5 (CH), 48.7 (C), 48.5 (CH), 46.4 (CH), 43.8 (CH), 43.5 (CH), 41.5 ( $\text{CH}_2$ ), 41.0 ( $\text{CH}_2$ ), 35.3 ( $\text{CH}_2$ ), 34.1 ( $\text{CH}_2$ ), 33.1 ( $\text{CH}_2$ ), 27.3 ( $\text{CH}_2$ ), 20.9 ( $\text{CH}_3$ ), 20.7 ( $\text{CH}_3$ ), 20.6 ( $\text{CH}_3$ ), 19.6 (2 $\text{CH}_3$ ). HRMS Calcd for  $\text{C}_{30}\text{H}_{38}\text{OS}_2$ : 478.2364, found 478.2381.

**Pauson-Khand Adduct of 7b with Norbornene.** Procedure B using as reagents **7b** (0.16 g, 0.45 mmol),  $\text{Co}_2(\text{CO})_8$  (0.16 g, 0.47 mmol), NMO (0.32 g, 2.8 mmol) and norbornene (0.42 g, 4.5 mmol) was followed. The reaction was performed at  $0^{\circ}\text{C}$  during 6 h, affording 55 mg (26% yield, two steps) of **12b** (39:61 diastereomeric ratio as determined by  $^{13}\text{C}$  NMR).

Procedure C using as reagents **7b** (0.15 g, 0.42 mmol),  $\text{Co}_2(\text{CO})_8$  (0.15 g, 0.43 mmol), and norbornene (0.39 g, 4.2 mmol) was followed. The reaction was performed at  $0^{\circ}\text{C}$  during 4 days affording 100 mg (50% yield, two steps) of **12b** (96:4 diastereomeric ratio as determined by  $^{13}\text{C}$  NMR).

Procedure D using as reagents **7b** (0.127 g, 0.28 mmol), norbornene (0.2 g, 2.12 mmol) and hexane (4 mL) was followed. The reaction was performed, after addition of the olefin at  $-15^{\circ}\text{C}$ , at  $0^{\circ}\text{C}$  during 48 h affording 30 mg (30% yield) of **12b** (89:11 diastereomeric ratio as determined by  $^{13}\text{C}$  NMR).

**4-[(1*S*,2*R*,4*R*)-7,7-Dimethyl-1-[(2,4,6-trimethylbenzylsulfanyl)methyl]bicyclo [2.2.1]hept-2-ylsulfanyl]tricyclo[5.2.1.0<sup>2,6</sup>]dec-4-en-3-one (12b).**  $[\alpha]_D = -19.75$  (c 1.2, CHCl<sub>3</sub>). IR (film)  $\nu_{\max} = 2956, 1698, 1565, 1457 \text{ cm}^{-1}$ . <sup>1</sup>H NMR (200 MHz, CDCl<sub>3</sub>)  $\delta$  6.96 (d, 1H), 6.79 (broad s, 2H), 3.80, 3.70 (AB, J=11Hz, 2H), 3.35-3.30 (dd, 1H), 2.93, 2.66 (AB, J= 12Hz, 2H), 2.33 (s, 6H), 2.22 (s, 3H), 2.6-0.95 (complex signal 17H), 1.05 (s, 3H), 0.89 (s, 3H). <sup>13</sup>C NMR (50 MHz, CDCl<sub>3</sub>)  $\delta$  205.5 (C), 152.7 (minor), 152.3 (major) (CH), 144.6 (2C), 136.8 (C), 136.3 (C), 131.3 (C), 128.8 (2CH), 53.9 (CH), 53.5 (C), 50.5 (CH major), 50.4 (CH minor), 49.2 (CH), 48.6 (C), 46.4 (CH), 40.9 (CH<sub>2</sub>), 39.2 (CH), 38.6 (CH), 35.3 (CH<sub>2</sub>), 34.1 (CH<sub>2</sub>), 33.0 (CH<sub>2</sub>), 31.3 (CH<sub>2</sub>), 28.8 (CH<sub>2</sub>), 28.3 (CH<sub>2</sub>), 27.3 (CH<sub>2</sub>), 20.9 (CH<sub>3</sub>), 20.7 (CH<sub>3</sub>), 20.6 (CH<sub>3</sub>), 19.6 (2CH<sub>3</sub>) ppm. HRMS Calcd for C<sub>30</sub>H<sub>41</sub>OS<sub>2</sub> (M+1): 481.2599, found 481.2568.

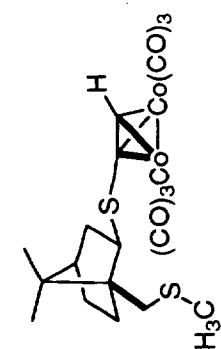

9a

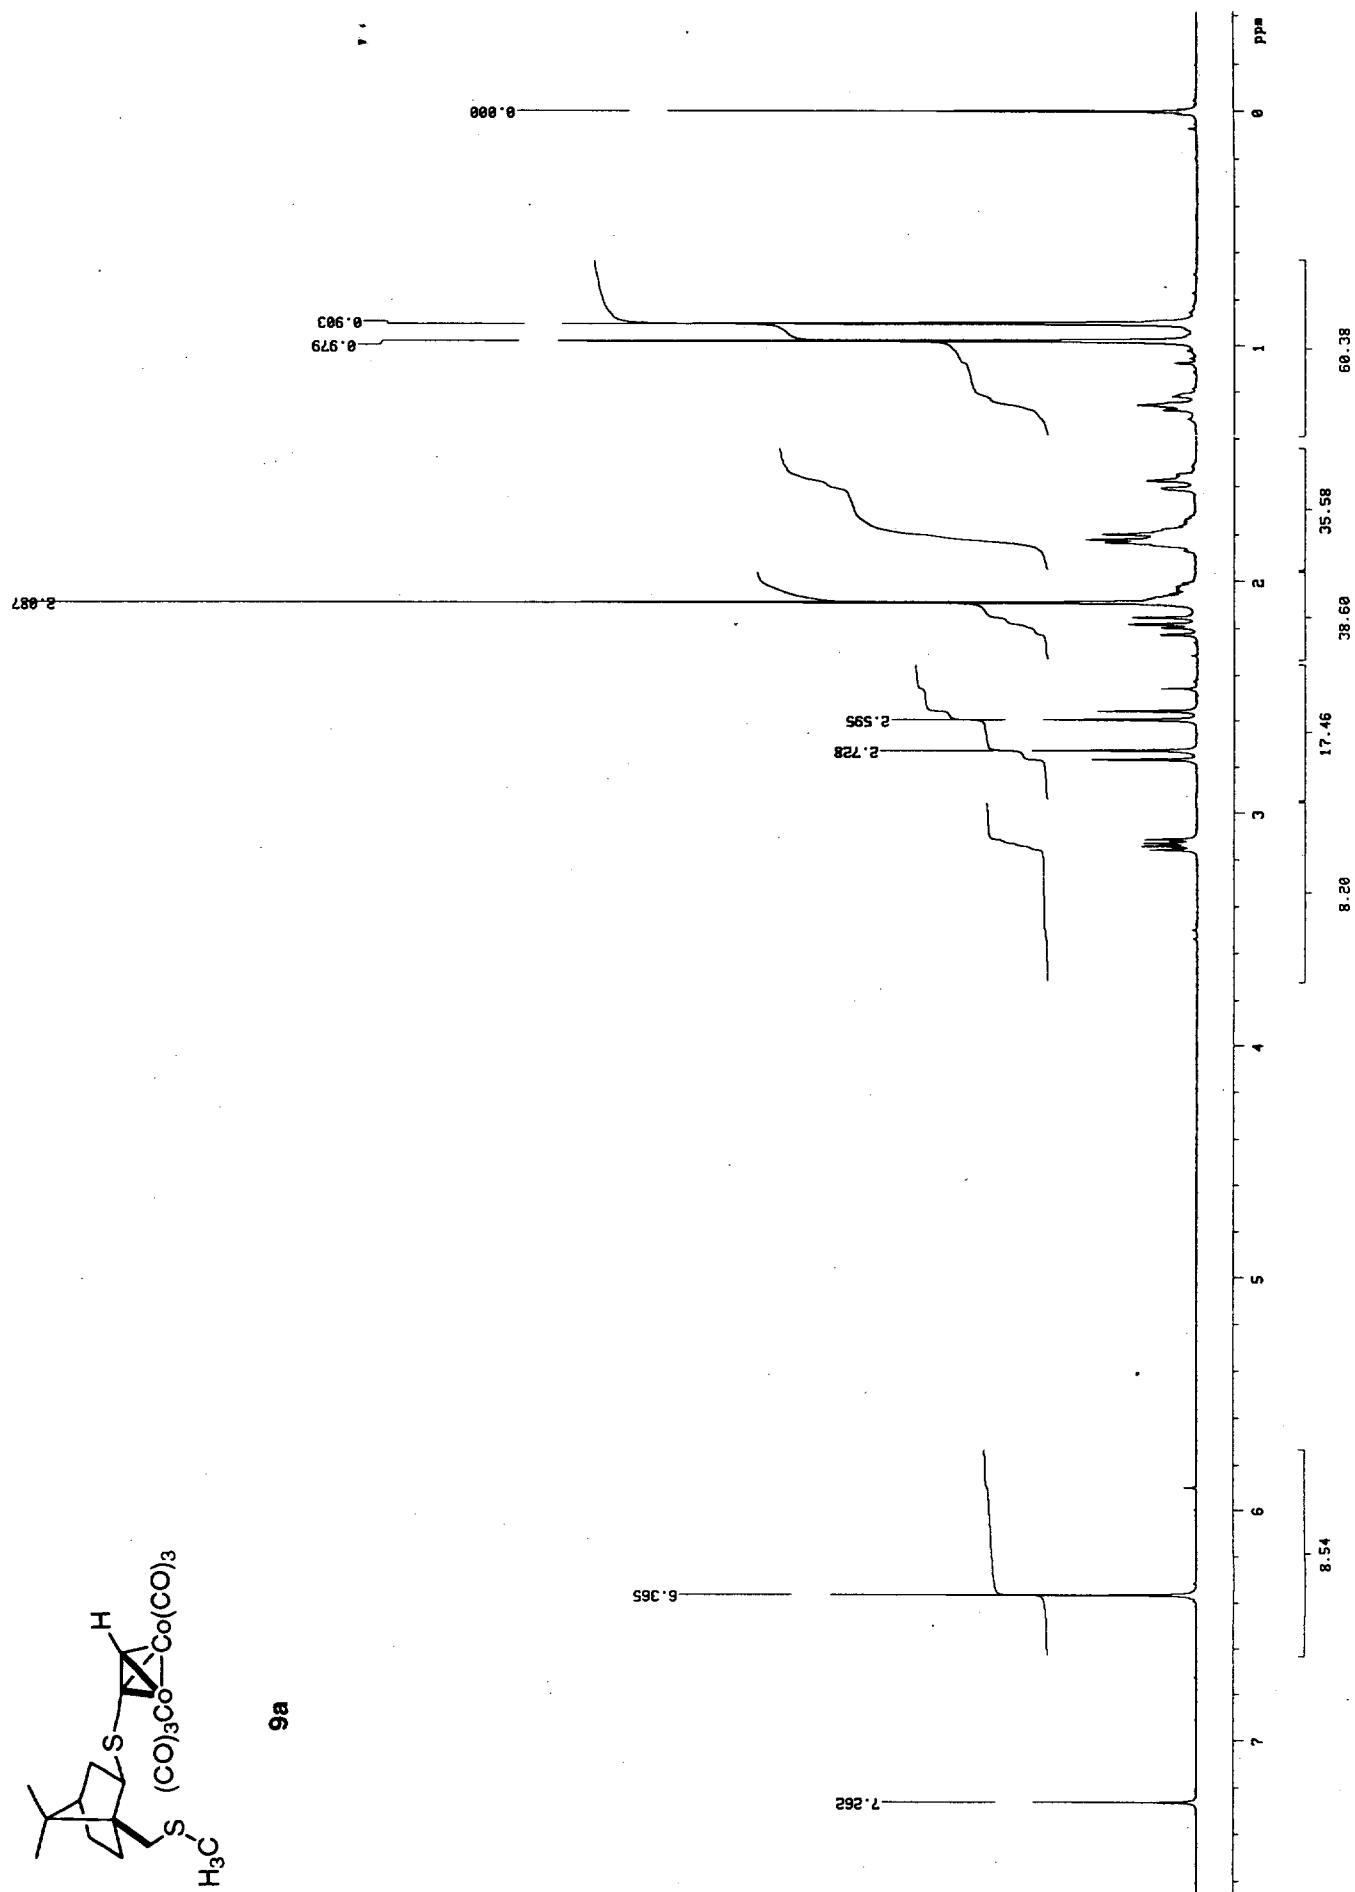

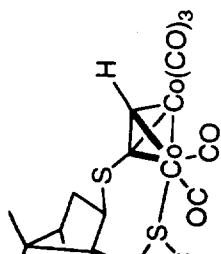

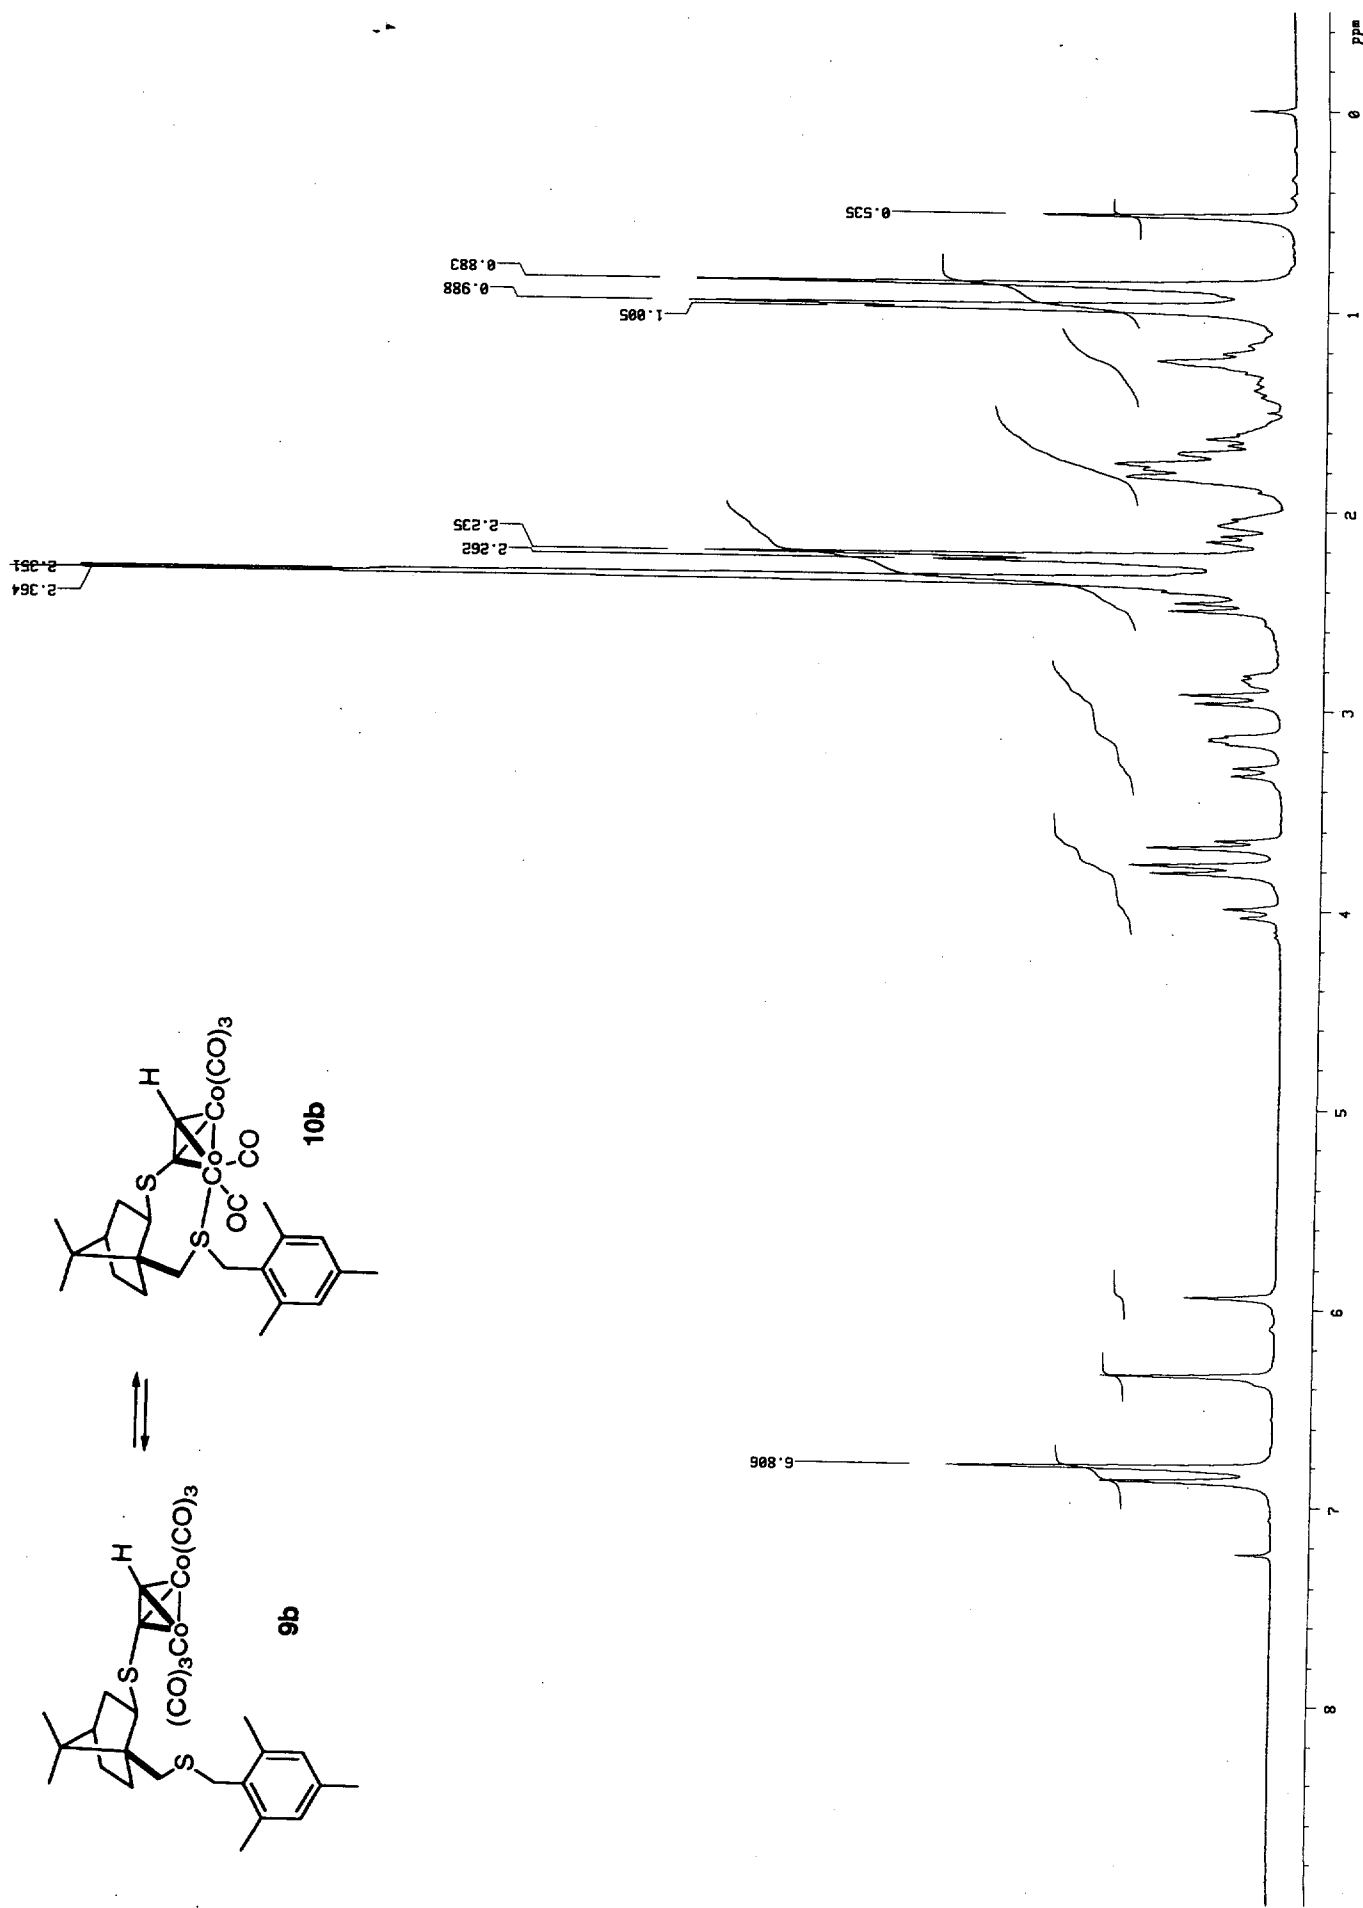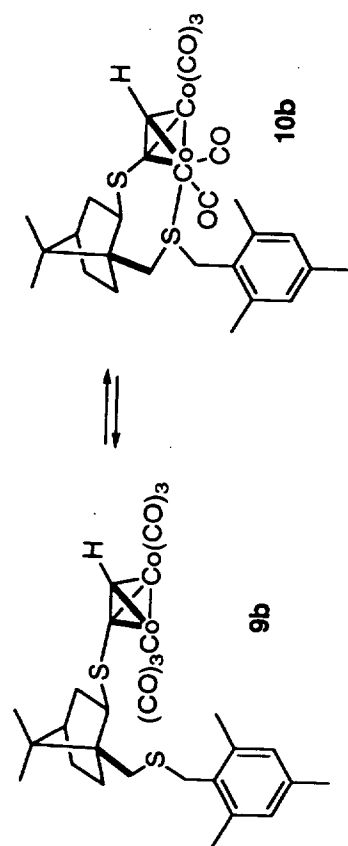

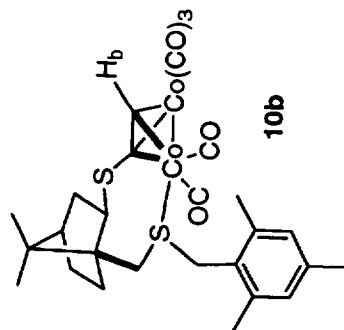

Supplement: Supplementary file 1 [file 5781978]
